# Supplementary material
Source: PubMed Central journal article supplement (PMC3981932)
Supplement: NIHMS545637-supplement-supplement_1.pdf [file NIHMS545637-supplement-supplement_1.pdf]

## Supplementary Online Appendix

### eAppendix A. Derivation of likelihood estimation for causal diagrams presented in Section I.

**Figure 1.**

Let  $\{M_m: m\}, \{N_n: n\}, \{O_o: o\}$  denote the finite support of M, N, and O, respectively. One observes that

$$\begin{aligned} P[Y|A, L, S = 1] &= \frac{P[Y, S = 1|A, L]}{P[S = 1|A, L]} \\ &= \frac{\sum_{m,n,o} P[Y, M_m, N_n, O_o, S = 1|A, L]}{\sum_{y,m,n,o} P[S = 1, Y_y, M_m, N_n|A, L]} \\ &= \frac{\sum_{m,n,o} P[S = 1|Y, M_m, N_n, O_o, A, L] f(M_m, N_n, O_o|Y, A, L) P[Y|A, L]}{\sum_{y,m,n,o} P[S = 1|Y_y, M_m, N_n, O_o, A, L] f(M_m, N_n, O_o|Y_y, A, L) P[Y_y|A, L]} \end{aligned}$$

Let  $\tau(Y, A, L) = \sum_{m,n,o} P[S = 1|Y, M_m, N_n, O_o, A, L] f(M_m, N_n, O_o|Y, A, L)$ . Therefore

$$\begin{aligned} P[Y|A, L, S = 1] &= \frac{\tau(Y, A, L) P[Y|A, L]}{\sum_y \tau(Y_y, A, L) P[Y = y|A, L]} \\ &= \frac{\tau(Y, A, L) \left[ \frac{e^{\{y(\alpha + \beta_1 A + \beta_2 L)\}}}{1 + e^{\{\alpha + \beta_1 A + \beta_2 L\}}} \right]}{\sum_{y=0}^1 \tau(y, A, L) \left[ \frac{e^{\{y(\alpha + \beta_1 A + \beta_2 L)\}}}{1 + e^{\{\alpha + \beta_1 A + \beta_2 L\}}} \right]} \\ &= \frac{\tau(Y, A, L) e^{\{y(\alpha + \beta_1 A + \beta_2 L)\}}}{\sum_{y=0}^1 \tau(y, A, L) e^{\{y(\alpha + \beta_1 A + \beta_2 L)\}}} \\ &= \frac{\tau(Y, A, L) e^{\{y(\alpha + \beta_1 A + \beta_2 L)\}}}{\tau(y = 0, A, L) e^{\{1(\alpha + \beta_1 A + \beta_2 L)\}} + \tau(y = 1, A, L) e^{\{0(\alpha + \beta_1 A + \beta_2 L)\}}} \\ &= \frac{\left[ \frac{\tau(Y, A, L)}{\tau(y = 0, A, L)} \right] e^{\{y(\alpha + \beta_1 A + \beta_2 L)\}}}{\left[ \frac{\tau(y = 0, A, L)}{\tau(y = 0, A, L)} \right] + \left[ \frac{\tau(y = 1, A, L)}{\tau(y = 0, A, L)} \right] e^{\{(\alpha + \beta_1 A + \beta_2 L)\}}} \\ &= \frac{\left[ \frac{\tau(y = 1, A, L)}{\tau(y = 0, A, L)} \right] e^{\{y(\alpha + \beta_1 A + \beta_2 L)\}}}{1 + \left[ \frac{\tau(y = 1, A, L)}{\tau(y = 0, A, L)} \right] e^{\{(\alpha + \beta_1 A + \beta_2 L)\}}} \end{aligned}$$

Thus, we conclude  $\text{logit}[P[Y|A, L, S = 1]] = \log \left[ \frac{\tau(y=1, A, L)}{\tau(y=0, A, L)} \right] + \alpha + \beta_1 A + \beta_2 L$ , indicating that selection bias induces an association between (A,L) and Y if  $\tau$  depends on A and L, in addition to its dependence on Y.

Below we consider a number of special cases of Figure 1, to illustrate settings where  $\tau$  induces bias, as well as settings where it does not.

**Figure 2.a.**

Recall from the detailed derivation provided for Figure 1 that

$$\begin{aligned} \tau(Y, A, L) &= \sum_{m,n,o} P[S = 1|Y, M_m, N_n, O_o, A, L] f(M_m, N_n, O_o|Y, A, L) \\ &= \sum_{m,n,o} P[S = 1|L, M_m, O_o] f(M_m|Y, A, L) f(O_o) \\ &= \sum_{m,n,o} P[S = 1|L, M_m, O_o, Y] f(M_m|Y, A, L) f(O_o) \end{aligned}$$

By the independencies encoded in the DAG. Therefore,

$$\begin{aligned} \text{logit}[P[Y|A, L, S = 1]] &= \log \left[ \frac{\sum_{m,n,o} P[S = 1|L, M_m, O_o, Y = 1] f(M_m|Y = 1, A, L) f(O_o)}{\sum_{m,n,o} P[S = 1|L, M_m, O_o, Y = 0] f(M_m|Y = 0, A, L) f(O_o)} \right] + \alpha + \beta_1 A + \beta_2 L \\ &= \log \left[ \frac{\sum_{m,n,o} P[S = 1|L, M_m, O_o, Y = 1] f(M_m|Y = 1, A, L)}{\sum_{m,n,o} P[S = 1|L, M_m, O_o, Y = 0] f(M_m|Y = 0, A, L)} \right] + \alpha + \beta_1 A + \beta_2 L \end{aligned}$$

which cannot be simplified further, and indicates selection bias in the association of (A,L) on Y.

While  $P[S = 1|L, M_n, O_o, Y = y]$  can be directly computed using the final sampling weights provided to the analyst, information on  $f(M_m|Y = y, A, L)$  may not be available. We note that  $f(M_m|Y = y, A, L)$  may be estimated using full maximum likelihood. As an alternative, we present a simple approach which utilizes the final sampling probabilities.

Instead,  $f(M_m|Y = 1, A, L)$  may be estimated using the following two regression models weighted by sampling probabilities and assuming binary M:

$$\begin{aligned} \text{logit}[P[M|Y = 0, A, L]] &= \eta_0 + \eta_1 A + \eta_2 L \\ \text{logit}[P[M|Y = 1, A, L]] &= \gamma_0 + \gamma_1 A + \gamma_2 L \end{aligned}$$

The predicted value of M setting Y to 0 or 1 can then be used to construct the offset term under the assumption that the association between A and M is constant across levels of L. Note that if A and L are binary or categorical, a saturated model involving all higher order interactions between A and L may be easily fit and the predicted value of M can be computed without any additional assumptions.

**Figure 2.b.**

Recall from the detailed derivation provided for Figure 1 that

$$\begin{aligned} \tau(Y, A, L) &= \sum_{m,n,o} P[S = 1|Y, M_m, N_n, O_o, A, L] f(M_m, N_n, O_o|Y, A, L) \\ &= \sum_{m,n,o} P[S = 1|M_m, N_n] f(M_m|L) f(N_n|A, L) f(O_o) \end{aligned}$$

by the independencies encoded in the DAG. Therefore,

$$\begin{aligned} \text{logit}[P[Y|A, L, S = 1]] &= \log \left[ \frac{\sum_{m,n,o} P[S = 1|M_m, N_n] f(M_m|L) f(N_n|A, L) f(O_o)}{\sum_{m,n,o} P[S = 1|M_m, N_n] f(M_m|L) f(N_n|A, L) f(O_o)} \right] + \alpha + \beta_1 A + \beta_2 L \\ &= \alpha + \beta_1 A + \beta_2 L \end{aligned}$$

which does not depend on  $\tau$  and therefore indicates no selection bias.

**Figure 3.**

Recall from the detailed derivation provided for Figure 1 that

$$\begin{aligned} \tau(Y, A, L) &= \sum_{m,n,o} P[S = 1|Y, M_m, N_n, O_o, A, L] f(M_m, N_n, O_o|Y, A, L) \\ &= \sum_{m,n,o} P[S = 1|M_m, N_n] f(M_m|L) f(N_n|L) f(O_o) \end{aligned}$$

by the independencies encoded in the DAG. Therefore,

$$\begin{aligned} \text{logit}[P[Y|A, L, S = 1]] &= \log \left[ \frac{\sum_{m,n,o} P[S = 1|M_m, N_n] f(M_m|L) f(N_n|L) f(O_o)}{\sum_{m,n,o} P[S = 1|M_m, N_n] f(M_m|L) f(N_n|L) f(O_o)} \right] + \alpha + \beta_1 A + \beta_2 L \\ &= \alpha + \beta_1 A + \beta_2 L \end{aligned}$$

which does not depend on  $\tau$  and therefore indicates no selection bias.

**Figure 4.a.**

Recall from the detailed derivation provided for Figure 1 that

$$\tau(Y, A, L) = \sum_{m,n,o} P[S = 1|Y, M_m, N_n, O_o, A, L] f(M_m, N_n, O_o|Y, A, L)$$

Recall also that in Figure 4.a. we take the exposure to be M. Therefore,  $\tau(Y, A, L)$  reduces to

$$\tau(Y, M, L) = \sum_{n,o} P[S = 1|N_n, M] f(N_n|L) f(O_o)$$

by the independencies encoded in the DAG. Therefore,

$$\begin{aligned} \text{logit}[P[Y|M, L, S = 1]] &= \log \left[ \frac{\sum_{n,o} P[S = 1|N_n, M] f(N_n|L) f(O_o)}{\sum_{n,o} P[S = 1|N_n, M] f(N_n|L) f(O_o)} \right] + \alpha + \beta_1 A + \beta_2 L \\ &= \alpha + \beta_1 M + \beta_2 L \end{aligned}$$

which does not depend on  $\tau$  and therefore indicates no selection bias.

**Figure 4.b.**

Recall from the detailed derivation provided for Figure 1 that

$$\tau(Y, A, L) = \sum_{m,n,o} P[S = 1|Y, M_m, N_n, O_o, A, L]f(M_m, N_n, O_o|Y, A, L)$$

Recall also that in Figure 4.b. we take the exposure to be N. Therefore,  $\tau(Y, A, L)$  reduces to

$$\tau(Y, N, L) = \sum_{m,o} P[S = 1|M_m, N]f(M_m|Y, L)f(O_o)$$

by the independencies encoded in the DAG. Therefore,

$$\begin{aligned} \text{logit}[P[Y = 1|N, L, S = 1]] &= \log \left[ \frac{\sum_{m,o} P[S = 1|M_m, N]f(M_m|Y = 1, L)f(O_o)}{\sum_{m,o} P[S = 1|M_m, N]f(M_m|Y = 0, L)f(O_o)} \right] + \alpha + \beta_1 N + \beta_2 L \\ &= \log \left[ \frac{\sum_m P[S = 1|M_m, N]f(M_m|Y = 1, L)}{\sum_m P[S = 1|M_m, N]f(M_m|Y = 0, L)} \right] + \alpha + \beta_1 N + \beta_2 L \end{aligned}$$

which indicates selection bias in the both L and N associations with Y.

While  $P[S = 1|M_m, N]$ , can be directly computed using the final sampling weights provided to the analyst, information on  $f(M_m|Y = y, L)$  may not be available. We note that  $f(M_m|Y = y, L)$  may be estimated using full maximum likelihood. As an alternative, we present a simple approach which utilizes the final sampling probabilities.

Instead  $f(M_m|Y = y, L)$  may be estimated using the following two regression models weighted by sampling probabilities and assuming binary M:

$$\begin{aligned} \text{logit}[P[M|Y = 0, L]] &= \eta_0 + \eta_1 L \\ \text{logit}[P[M|Y = 1, L]] &= \gamma_0 + \gamma_1 L \end{aligned}$$

The predicted values of M can then be used to construct the offset term under the assumption of no model misspecification.

**Figure 5.a.**

Recall from the detailed derivation provided for Figure 1 that

$$\tau(Y, A, L) = \sum_{m,n,o} P[S = 1|Y, M_m, N_n, O_o, A, L]f(M_m, N_n, O_o|Y, A, L)$$

Recall also that in Figure 5.a. we take the outcome to be M. Therefore,  $\tau(Y, A, L)$  reduces to

$$\tau(M, A, L) = \sum_{n,o} P[S = 1|M, N_n]f(M|A, L)f(N_n|A, L)f(O_o)$$

by the independencies encoded in the DAG. Therefore,

$$\begin{aligned} \text{logit}[P[M = 1|A, L, S = 1]] &= \log \left[ \frac{\sum_n P[S = 1|M = 1, N_n]f(M = 1|A, L)f(N_n|A, L)f(O_o)}{\sum_n P[S = 1|M = 0, N_n](M = 0|A, L)f(N_n|A, L)f(O_o)} \right] + \alpha + \beta_1 A + \beta_2 L \\ &= \log \left[ \frac{\sum_n P[S=1|M=1, N_n]f(N_n|A, L)}{\sum_n P[S=1|M=0, N_n]f(N_n|A, L)} \right] + \alpha + \beta_1 A + \beta_2 L \end{aligned}$$

which indicates selection bias in both A and L associations with M.

While  $P[S = 1|M = m, N_n]$  can be directly computed using the final sampling weights provided to the analyst, information on  $f(N_n|A, L)$ , may not be directly available. We note that  $f(N_n|A, L)$  may be estimated using full maximum likelihood. As an alternative, we present a simple approach which utilizes the final sampling probabilities.

Instead  $f(N_n|A, L)$ , may be estimated using the following regression model weighted by sampling probabilities and assuming binary N:

$$\text{logit}[P[N|A, L]] = \eta_0 + \eta_1 A + \eta_2 L$$

The predicted value of N can then be used to construct the offset term under the assumption that the association between A and N is constant across levels of L. Note that if A and L are binary or categorical, a saturated model involving all

higher order interactions between A and L may be easily fit and the predicted value of N can be computed without any additional assumptions.

**Figure 5.b.**

Recall from the detailed derivation provided for Figure 1 that

$$\tau(Y, A, L) = \sum_{m,n,o} P[S = 1|Y, M_m, N_n, O_o, A, L]f(M_m, N_n, O_o|Y, A, L)$$

Recall also that in Figure 5.b. we take the outcome to be N. Therefore,  $\tau(Y, A, L)$  reduces to

$$\tau(N, A, L) = \sum_{m,o} P[S = 1|M_m, N]f(M_m|L)f(N|A, L)f(O_o)$$

by the independencies encoded in the DAG. Therefore,

$$\begin{aligned} \text{logit}[P[N = 1|A, L, S = 1]] &= \log \left[ \frac{\sum_m P[S = 1|M_m, N = 1]f(M_m|L)f(N = 1|A, L)f(O_o)}{\sum_m P[S = 1|M_m, N = 0]f(M_m|L)f(N = 0|A, L)f(O_o)} \right] + \alpha + \beta_1 A + \beta_2 \\ &= \log \left[ \frac{\sum_m P[S=1|M_m, N=1]f(M_m|L)}{\sum_m P[S=1|M_m, N=0]f(M_m|L)} \right] + \alpha + \beta_1 A + \beta_2 L \end{aligned}$$

which indicates selection bias in the L-N association.

While  $P[S = 1|M_m, N = n]$ , can be computed using the final sampling weights provided to the analyst, information on  $f(M_m|L)$  may not be directly available. We note that  $f(M_m|L)$  may be estimated using full maximum likelihood. As an alternative, we present a simple approach which utilizes the final sampling probabilities.

Instead  $f(M_m|L)$  may be estimated using the following regression model assuming binary M:

$$\text{logit}[P[M|L]] = \eta_0 + \eta_1 L$$

The predicted values of M can then be used to construct the offset term under the assumption of no model misspecification.

**Figure 6.**

Recall from the detailed derivation provided for Figure 1 that

$$\tau(Y, A, L) = \sum_{m,n,o} P[S = 1|Y, M_m, N_n, O_o, A, L]f(M_m, N_n, O_o|Y, A, L)$$

Recall also that in Figure 6 we take the exposure to be M and the outcome to be N. Therefore,  $\tau(Y, A, L)$  reduces to

$$\tau(N, M, L) = \sum_o P[S = 1|M, N = 1]f(M|L)f(O_o)$$

by the independencies encoded in the DAG. Therefore,

$$\begin{aligned} \text{logit}[P[N = 1|M, L, S = 1]] &= \log \left[ \frac{P[S = 1|M, N = 1]f(M|L)f(O_o)}{P[S = 1|M, N = 0]f(M|L)f(O_o)} \right] + \alpha + \beta_1 A + \beta_2 L \\ &= \log \left[ \frac{P[S = 1|M, N = 1]f(M|L)}{P[S = 1|M, N = 0]f(M|L)} \right] + \alpha + \beta_1 M + \beta_2 L \\ &= \log \left[ \frac{P[S = 1|M, N = 1]}{P[S = 1|M, N = 0]} \right] + \alpha + \beta_1 M + \beta_2 L \end{aligned}$$

which indicates selection bias in the M-N association.

## Appendix B. SAS code used in the simulation study

```
%macro sim_select(q,c_strength,alpha,beta1,beta2,beta3);

data simulate&q.;

*** specify number and distribution of categories for m ***;
num_mcat = 3;
c1 = 1/num_mcat; c2 = 1/num_mcat; c3 = 1/num_mcat;

*** create m, n, and o variables (i.e. determinants of selection) ***;
do i = 1 to 40000;
    m_cont = round(uniform(0)*100);

    *** distribute continuous m evenly into 3 categories ***;
    m_cat = (m_cont ge 0)
        + (m_cont gt c1*100)
        + (m_cont gt (c1 + c2)*100)
        + (m_cont gt (c1 + c2 + c3)*100);

    m_cat1 = (m_cat = 1);
    m_cat2 = (m_cat = 2);
    m_cat3 = (m_cat = 3);

    *** create o variable and confounder ***;
    o_binary = rand('bernoulli',0.25);
    conf = (log(&c_strength.)*m_cat1 + rand('normal'));

    *** create n variable based on the following individual risk model:
        logit(P[N=1|M,L])=α+β1*M1+β2*M2+β3*L ***;
    linpred = &alpha. + &beta1.*m_cat1 + &beta2.*m_cat2 + &beta3.*conf;
    prob = exp(linpred)/ (1 + exp(linpred));
    n_binary = rand('bernoulli',prob);

    *** create m-n-o indicator ***;
    mno_cat = m_cat*100 + n_binary*10 + o_binary;
output;
end;
run;

*** create allocation proportions for input into proc surveyselect ***;
data samp_prob_mno; set simulate&q.;
    _alloc_ = .;
    if mno_cat = 100 then _alloc_ = 0.2;
    if mno_cat = 200 then _alloc_ = 0.01;
    if mno_cat = 300 then _alloc_ = 0.19;
    if mno_cat = 110 then _alloc_ = 0.1;
    if mno_cat = 210 then _alloc_ = 0.05;
    if mno_cat = 310 then _alloc_ = 0.05;
    if mno_cat = 101 then _alloc_ = 0.05;
    if mno_cat = 201 then _alloc_ = 0.0025;
    if mno_cat = 301 then _alloc_ = 0.0475;
    if mno_cat = 111 then _alloc_ = 0.15;
    if mno_cat = 211 then _alloc_ = 0.075;
    if mno_cat = 311 then _alloc_ = 0.075;
    keep m_cat n_binary o_binary mno_cat conf _alloc_;
run;

*** select 1% sub-sample (n=400) according to m and n ***;
proc sort data = samp_prob_mno; by mno_cat; run;
proc sort data = simulate&q.; by mno_cat; run;
proc surveyselect data = simulate&q.
    out = simulate_svy_mno&q.
    sampsize = 400;
    strata mno_cat /alloc = samp_prob_mno;
run;

*** obtain selection probability (i.e. tau) ***;
proc sort data = simulate_svy_mno&q.; by mno_cat;
```

```

proc means data = simulate_svy_mno&q.;
  by mno_cat;
  var selectionprob;
  ods output summary = offsets&q. (keep = mno_cat SelectionProb_Mean);
run;

*** add m, n, and o variables to selection probabilities file ***;
data offsets&q.; set offsets&q.;
  if mno_cat = 100 or mno_cat = 200 or mno_cat = 300 or
     mno_cat = 101 or mno_cat = 201 or mno_cat = 301 then n_binary = 0;
  if mno_cat = 110 or mno_cat = 210 or mno_cat = 310 or
     mno_cat = 111 or mno_cat = 211 or mno_cat = 311 then n_binary = 1;
  if mno_cat = 100 or mno_cat = 200 or mno_cat = 300 or
     mno_cat = 110 or mno_cat = 210 or mno_cat = 310 then o_binary = 0;
  if mno_cat = 111 or mno_cat = 211 or mno_cat = 311 or
     mno_cat = 101 or mno_cat = 201 or mno_cat = 301 then o_binary = 1;
  m_cat = (mno_cat - n_binary*10 - o_binary)/100;
run;

proc sort data = offsets&q.; by m_cat o_binary; run;
proc transpose data = offsets&q. out = offsets&q. prefix = SelectionProbN;
  by m_cat o_binary;
  id n_binary;
  var SelectionProb_Mean;
run;

*** merge selection probability file with simulated survey data ***;
proc sort data = offsets&q.; by m_cat o_binary; run;
proc sort data = simulate_svy_mno&q.; by m_cat o_binary; run;
data simulate_svy_mno&q.;
  merge offsets&q. simulate_svy_mno&q.;
  by m_cat o_binary;

  *** create offset term from ratio of selection probabilities (i.e. tau) ***;
  offset = log(SelectionProbN1/SelectionProbN0);
  m_cat1 = (m_cat = 1);
  m_cat2 = (m_cat = 2);
  m_cat3 = (m_cat = 3);

  id = _n_;

  keep id n_binary m_cont m_cat o_binary samplingweight offset m_cat1 m_cat2 m_cat3 conf;
run;

*****;
*** estimate alpha and beta coefficients from logistic regression models
    with and without adjustment for selection ***;
*****;
*** no adjustment ***;
proc logistic descending data = simulate_svy_mno&q.;
  model n_binary = m_cat1 m_cat2 conf;
  ods output ParameterEstimates = noadjust (keep = Variable Estimate StdErr);
run;
data noadjust_betas&t.; set noadjust_betas&t.noadjust; run;

*** adjust via unweighted conditional regression ***;
proc logistic descending data = simulate_svy_mno&q.;
  model n_binary = m_cat1 m_cat2 conf o_binary;
  ods output ParameterEstimates = condition (keep = Variable Estimate StdErr);
run;
data condition_betas&t.; set condition_betas&t.condition; run;

*** adjust via weighted unconditional regression ***;
proc genmod descending data = simulate_svy_mno&q.;
  class id;
  weight samplingweight;
  model n_binary = m_cat1 m_cat2 conf / link=logit dist=binomial;
  repeated subject=id / type=ind;
  ods output GEEEmpPEst = ipw (keep = Parm Estimate UpperCL LowerCL);
run;

```

```

data ipw_betas&t.; set ipw_betas&t.ipw; run;

*** adjust via maximum likelihood ***;
proc logistic descending data = simulate_svy_mno&q.;
  model n_binary = m_cat1 m_cat2 conf /offset = offset;
  ods output ParameterEstimates = like (keep = Variable Estimate StdErr);
run;
data like_betas&t.; set like_betas&t.like; run;

%mend sim_select;

%macro looper(t,c_strength,alpha,beta1,beta2,beta3);

*** create empty data sets to store alpha and beta coefficients ***;
data noadjust_betas&t.; set _null_; run;
data condition_betas&t.; set _null_; run;
data ipw_betas&t.; set _null_; run;
data like_betas&t.; set _null_; run;

*** conduct 1,000 simulations ***;
%do q = 1 %to 1000;
  %sim_select(&q.,&c_strength.,&alpha.,&beta1.,&beta2.,&beta3.);
  proc datasets library = work;
    delete
      simulate&q.
      simulate_svy_mno&q.
      offsets&q.;
  run;
%end;

%mend looper;

*****;
*** run simulation under 8 model specifications defined by:
  a) weak and strong exposure effects
      ( $\beta_1=0.1, \beta_2=0.4$  and  $\beta_1=0.4, \beta_2=0.8$ , respectively),
  b) weak and strong confounding effects
      ( $\beta_3=0.4$  and  $\beta_3=0.8$ , respectively), and
  c) weak and strong associations between exposure and confounder
      ( $OR(E-C)=1.1$  and  $OR(E-C)=1.6$ , respectively)
  with all assuming a 2% marginal disease prevalence ( $\alpha=-3.9$ ) ***;
*****;
%looper(1,1.1,-3.9,0.1,0.4,0.4);
%looper(2,1.1,-3.9,0.1,0.4,0.8);
%looper(3,1.1,-3.9,0.2,0.8,0.4);
%looper(4,1.1,-3.9,0.2,0.8,0.8);
%looper(5,1.6,-3.9,0.1,0.4,0.4);
%looper(6,1.6,-3.9,0.1,0.4,0.8);
%looper(7,1.6,-3.9,0.2,0.8,0.4);
%looper(8,1.6,-3.9,0.2,0.8,0.8);

```
